# Supplementary material
Source: Springer Nature journal article supplement (https://www.springermedizin.de/resource/supplementary/13052_2014_380_MOESM2_ESM.pdf/9672006)

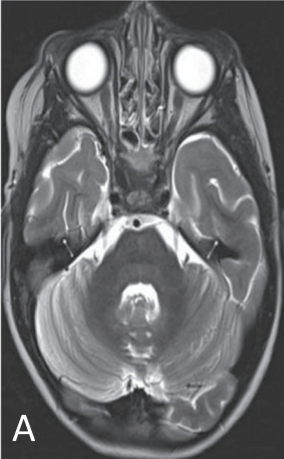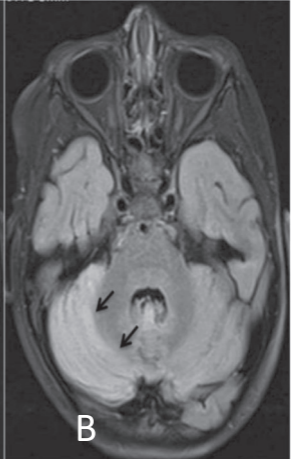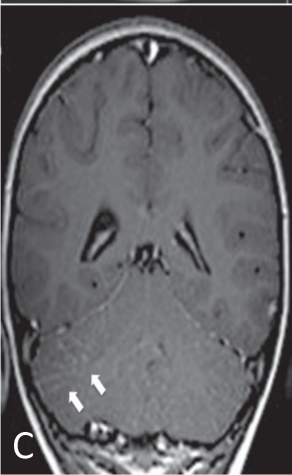

Supplement: MOESM2 [file 9672006]
